# Supplementary material for: Analysis of Interacting Proteins of Aluminum Toxicity Response Factor ALS3 and CAD in Citrus
Source: Int J Mol Sci. 2019 Sep 29;20(19):4846. doi: 10.3390/ijms20194846 (PMC6801426; doi:10.3390/ijms20194846)
Supplement: Supplementary file 1 [file ijms-20-04846-s001.zip › Table S1.xlsx]

## Sheet: Sheet1
		Table S1. RT-qPCR primers for ALS3 and CAD and their interacting proteins
		Y2H code	Accession number	Protein name	Forward primer (5'-3')	Reverse primer (5'-3')
		ALS3	Cs6g03670.1	Aluminum Sensitive 3 (ALS3)	TACCCCGTGGGAAGTATGTCG	CCTGCTGCTTTGTTGCCTGT
		CAD	Cs8g04980.1	Cinnamyl alcohol dehydrogenase (CAD)	GGGCTCGGAGGAGTAGGTCA	AAAGGTAAGGCTCCAGAGGGTG
		C51	Cs5g32800.1	Glutathione S-transferase (GST)	GGTCCACGGTTCTGTTTTCTCAA	AGTGCCTCCACCTCCTTCCATAC
		C55	Cs3g25710.1	V-type proton ATPase (V-ATPase)	GGCGGGAGTTTTGGGTATTTACG	GCTGTTGAGCATTGGCTCTGACA
		C125	Cs1g17390.1	Cytochrome P450 71A1 (CP450)	CTCCACCTCATCGGCTCACTTC	TGTACTTGCCTGCGGCTGTTTT
		C131	Cs8g16640.1	Aquaporin PIP2 (PIP2)	GAGTTCTCAGCCAAGGACTACCACG	GAATGAAGATCATGCCACCAAAGG
		A97	Cs3g10410.1	Ubiquitin carboxyl-terminal hydrolase 13 (UCT13)	ATGGGCGACAACGCAATATCAAGGG	CCCTTGATATTGCGTTGTCGCCCAT
		A102	Cs8g03780.1	Uncharacterized protein 1 (UP1)	GACGAAAATATGCAAAGTCCCCATC	GGCTTGTCCTCCTCAATTCTCCC
		A492	Cs4g18120.1	Putative dicyanin blue copper protein (DCBC)	AACAACAACTTTTCGGTCGGAGAC	TAGAAGGAGGAGTGGCGGTGG
		A615	Cs7g02860.1	Uncharacterized protein 2 (UP2)	CTGGAGGAATGGGATGAAAGCA	CATTTGGGGCAATCTTCGACTT
